# Supplementary material for: Preparation of raspberry-like γ-Fe2O3/crackled nitrogen-doped carbon capsules and their application as supports to improve catalytic activity
Source: Royal Society of Chemistry journal article supplement (doi:10.1039/c6nr05418h), 2016-01-01
Supplement: c6nr05418h1.pdf [file c6nr05418h1.pdf]

**Preparation of raspberry-like  $\gamma$ -Fe<sub>2</sub>O<sub>3</sub>/crackled nitrogen-doped carbon capsules and their application as supports to improve catalytic activity**

Junshuai Zhang,<sup>a</sup> Hui Zhang,<sup>b</sup> Xiao Zhang,<sup>a</sup> Jie Wu<sup>\*b</sup> and Tongjie Yao<sup>\*a</sup>

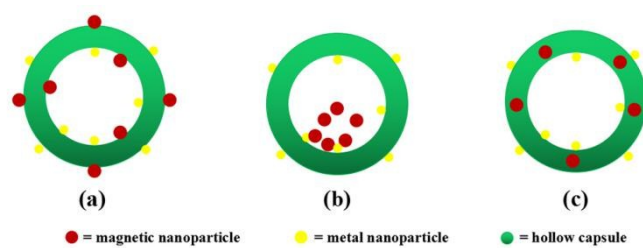

**Fig. S1** Positions for magnetic nanoparticles in the hollow capsules: (a) anchoring on the inner and outer surface of capsule shell; (b) loading in the hollow voids; (c) embedding in the capsule shell.

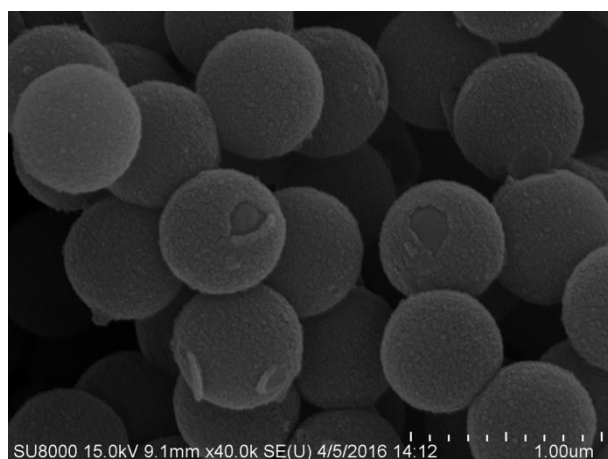

**Fig. S2** SEM image of broken PS/PB/PPy composites.

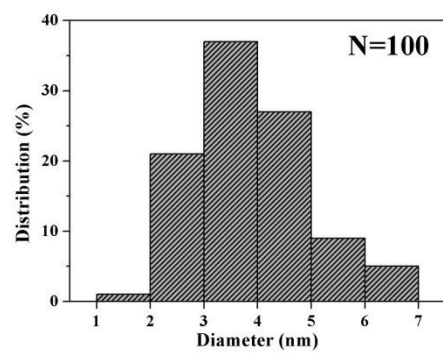

**Fig. S3** Histogram of size distribution of Pd nanoparticles in  $\gamma\text{-Fe}_2\text{O}_3/\text{CNC@Pd}$  catalysts.

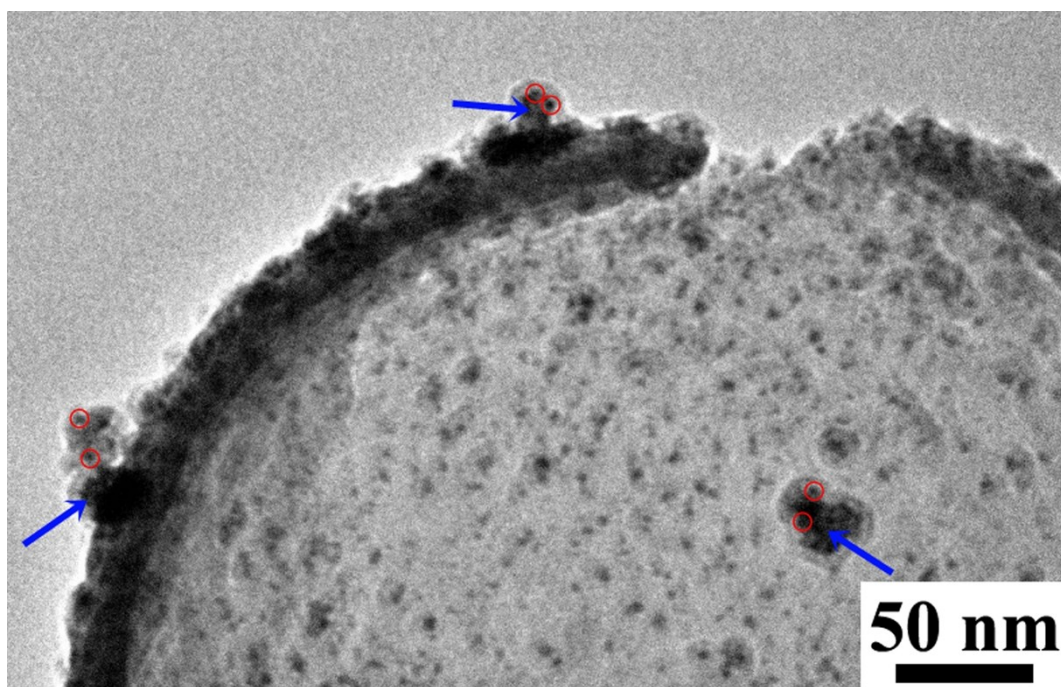

**Fig. S4** Magnified TEM image of  $\gamma\text{-Fe}_2\text{O}_3/\text{CNC@Pd}$  catalysts. The red circles indicated Pd nanoparticles and the blue arrows indicated  $\gamma\text{-Fe}_2\text{O}_3$  nanoparticles.

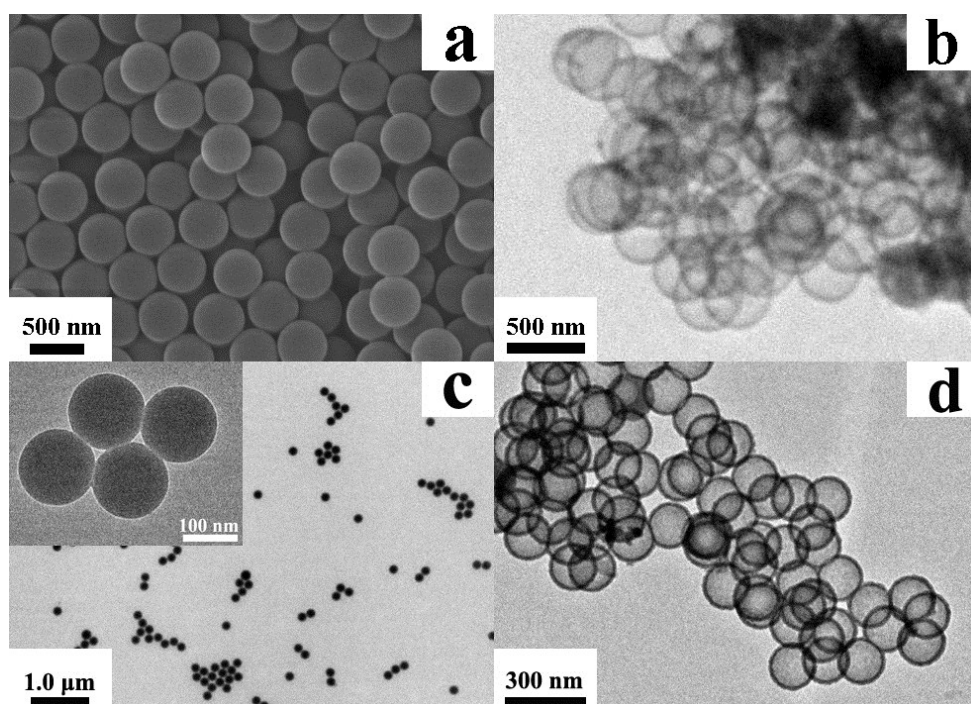

**Fig. S5** (a) SEM image of PS nanoparticles with size of 470 nm; (b) TEM image of  $\gamma$ -Fe<sub>2</sub>O<sub>3</sub>/CNC capsules by using 470 nm PS as hard-templates; (c) TEM image of PS nanoparticles with size of 150 nm, inset shows the corresponding magnified image; (d) TEM image of  $\gamma$ -Fe<sub>2</sub>O<sub>3</sub>/CNC capsules by using 150 nm PS as hard-templates.

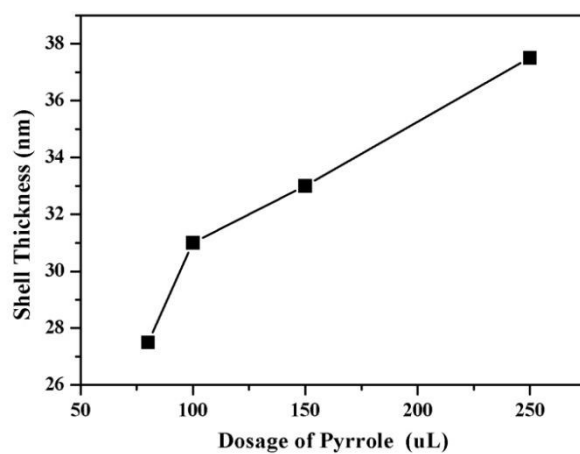

**Fig. S6** The relationship between the capsule shell thickness and dosage of pyrrole monomer. Herein, the 470 nm PS nanoparticles were selected as the hard-templates to construct  $\gamma$ -Fe<sub>2</sub>O<sub>3</sub>/CNC capsules.

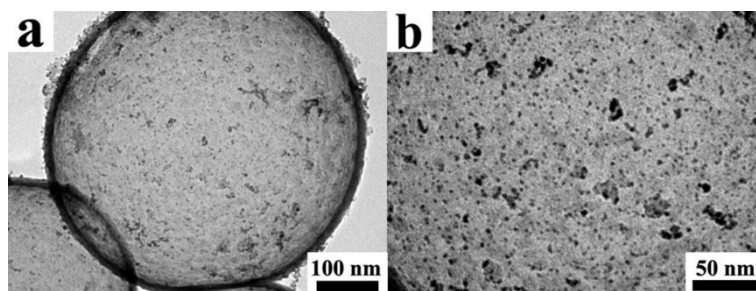

**Fig. S7** TEM images of (a)  $\gamma\text{-Fe}_2\text{O}_3/\text{CNC}@Pd$  catalysts with 10.4 wt% Pd loading; (b) the corresponding magnified image.



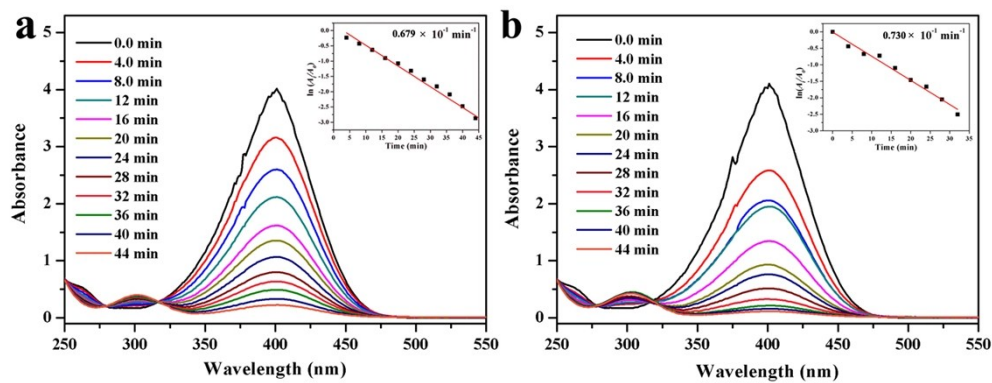

**Fig. S8** Time-dependent UV-vis spectra of catalytic reduction of 4-NP by using  $\gamma$ - $\text{Fe}_2\text{O}_3/\text{CNC}@\text{Pd}$  catalysts prepared by different size of PS nanoparticles: (a) 150 nm; (b) 470 nm. Insets show that the dependence of  $\ln(A_t/A_0)$  on reaction time  $t$  for the reactions.

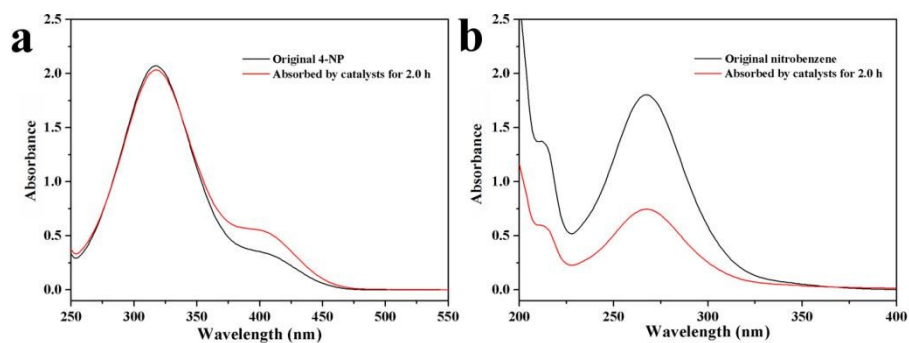

**Fig. S9** Adsorption of  $\gamma\text{-Fe}_2\text{O}_3/\text{CNC@Pd}$  catalysts towards (a) 4-NP solution and (b) nitrobenzene solution for 2.0 h. The experimental condition: 0.1 mg catalysts were added into 6.0 mL 4-NP solution or nitrobenzene solution with the same concentration of 33 mg/L.

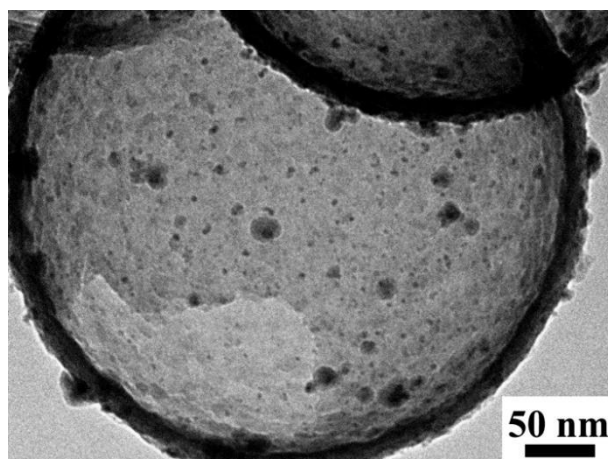

**Fig. S10** TEM image of  $\gamma\text{-Fe}_2\text{O}_3/\text{CNC}@Pd$  catalysts after being used in catalytic tests for 4 times.
